# Supplementary material for: Up-regulated IL-17 and Tnf signaling in bone marrow cells of young male osteogenesis imperfecta mice
Source: PeerJ. 2022 Aug 23;10:e13963. doi: 10.7717/peerj.13963 (PMC9415356; doi:10.7717/peerj.13963)
Supplement: Supplemental Information 1 [file peerj-10-13963-s001.xlsx]

## Sheet: Ifit Irf7
		Ifit1	Irf7	Gapdh
	WT-1	25.85	23.74	16.23
	WT-1	25.94	23.67	16.17
	WT-1	25.82	23.78	16.21
	WT-2	26.67	24.32
	WT-2	26.59	24.28	17.77
	WT-2	26.51	24.33	16.47
	WT-3	27.08	24.42	16.13
	WT-3	27.24	24.41	16.18
	WT-3	27.13	24.44	16.21
	A1-1	24.16	22.82	17.51
	A1-1	24.27	22.8	17.51
	A1-1	24.2	22.82	17.52
	A1-2	24.3	22.99	17.56
	A1-2	24.33	22.99	17.58
	A1-2	24.31	22.98	17.56
	A1-3	21.69	20.74	16.06
	A1-3	21.71	20.8	16.1
	A1-3	21.69	20.79	15.99
	A2-1	22.67	21.49	16.55
	A2-1	22.64	21.5	16.56
	A2-1	22.59	21.49	16.57
	A2-2	23.29	21.28	15.79
	A2-2	23.24	21.27	15.83
	A2-2	23.3	21.23	15.81
	A2-3	21.93	20.93	16.02
	A2-3	22.05	21.03	16.13
	A2-3	22.04	21.04	16.18

## Sheet: Ccl2
		Ccl2	Gapdh
	WT-1	27.3	17.98
	WT-1	27.2	18.01
	WT-1	27.09	18.1
	WT-2	28.03	18.63
	WT-2	27.77	18.62
	WT-2	27.65	18.57
	WT-3	27.31	18.29
	WT-3	27.54	18.13
	WT-3	27.61	18.45
	A1-1	25.25	19.68
	A1-1	25.19	19.73
	A1-1	25.18	19.68
	A1-2	25.42	19.65
	A1-2	25.23	19.66
	A1-2	25.24	19.7
	A1-3	24.96	18.54
	A1-3	24.97	18.58
	A1-3	25.13	18.49
	A2-1	24.2	18.59
	A2-1	24.18	18.63
	A2-1	24.24	18.63
	A2-2	24	17.81
	A2-2	24.08	17.76
	A2-2	24.13
	A2-3	25.94	19.16
	A2-3	25.92	19.2
	A2-3	25.84	19.14

## Sheet: Jun Cxcl10 Ifng Fosb Stat1
	Jun	Cxcl10	Ifng	Fosb	Stat1	Gapdh			Cxcl10	Ifng	Fosb	Gapdh			Stat1	Gapdh
WT-1	22.87	26.69	28.12	27.73	21.76	16.45		WT-4	23.54	25.18	30.65	14.86		WT-4	19.14	14.86
WT-1	22.84	26.54	28.04	27.72	21.91	16.46		WT-4	23.9	25.5	31.52	14.88		WT-4	19.07	14.88
WT-1	22.87	26.29	28.18	27.77	21.94	16.42		WT-4	23.66	24.97	30.49	15.03		WT-4	19.02	15.03
WT-2	22.71	27.24	28.79	28.11	22.08	16.62		WT-5	24.47	25.6	30.49	15.25		WT-5	19.69	15.25
WT-2	22.7	27.13	28.5	28.18	22.15	16.67		WT-5	24.75	25.69	30.96	15.39		WT-5	19.6	15.39
WT-2	22.68	27.29	28.46	28.28	22.09	16.66		WT-5	24.61	25.51		15.39		WT-5		15.39
WT-3	22.85	27.77	27.97	28.14	22.27	16.53		WT-6	25.3	26.13	30.87	16		A1-4	19.45	15.96
WT-3	22.76	27.65	28.16	28.23	22.31	16.45		WT-6	25.67	26.54	30.79	16.23		A1-4	19.4	15.88
WT-3	22.84	27.87	28.1	28.26	22.34	16.51		WT-6	25.44	25.16	31.13	16.17		A1-4	19.39	15.86
A1-1	22.3	26.97	27.55	26.98	22.83	17.81		A1-4	23.33	23.81	29.53	15.96		A2-4	17.98	15.28
A1-1	22.26	27.01	27.63	27.09	23.07	17.82		A1-4	23.67	23.56	30.31	15.88		A2-4	18.82	14.72
A1-1	22.3	26.95	27.74	27.03	23.11	17.78		A1-4	23.74	23.63		15.86		A2-4	18.73	14.87
A1-2	22.3	27.16	29.43	28.64	23.11	17.85		A1-5	23.78	24.96	30.4	15.44		A2-5	17.68	13.89
A1-2	22.3	27.23	29.13	28.54	23.13	17.86		A1-5	23.62	25.38	31.58	15.55		A2-5	18.03	14.03
A1-2	22.3	27.21	28.57	28.51	23.11	17.82		A1-5	23.31		30.76	15.42		A2-5	17.98	13.98
A1-3	21.33	24.82	27.01	27.89	20.68	16.27		A1-6	21.98	24.19	27.72	14.63
A1-3	21.42	24.85	26.88	27.99	20.65	16.42		A1-6	21.86	24.5	28.39	14.24
A1-3	21.33	24.78	27.05	27.96	20.65	16.28		A1-6	21.62	24.1	28.56	14.13
A2-1	19	25.59	26.14	25.15	21.58	16.84		A2-4	23.05	22.53	29.69	15.28
A2-1	21.6	25.53	26.21	25.12	21.5	16.84		A2-4	22.75	22.54	29.25	14.72
A2-1	21.57	25.53	26.06	24.94	21.49	16.78		A2-4	22.72	22.37	29.41	14.87
A2-2	20.54	25.17	24.89	24.52	20.74	15.85		A2-5	22.22	21.8	28.66	13.89
A2-2	20.48	25.24	25.28	24.53	20.75	15.85		A2-5	22.21	21.93	28.77	14.03
A2-2	20.51	25.29	25.18	24.49	20.75	15.88		A2-5	21.87	21.85	28.68	13.98
A2-3	21.69	26.66	27.31		20.81	16.64		A2-6	23.79	24.79		15.43
A2-3	21.74	26.71	27.61		20.79	16.77		A2-6	23.45	24.03		14.84
A2-3	21.77	26.79	29.18		20.91			A2-6	23.36	23.93		14.49

## Sheet: Lif
		Lif	Gapdh			Lif	Gapdh
	WT-1	29.74	15.47		WT-4	17.75	14.86
	WT-1	30.16	15.54		WT-4	17.87	14.88
	WT-1	31.99	15.38		WT-4	17.99	15.03
	WT-2	28.87	15.08		WT-5	18.42	15.25
	WT-2	29.9	14.91		WT-5	18.21	15.39
	WT-2	29.74	15.03		WT-5	18.29	15.39
	WT-3	28.95	14.65		WT-6	19.82	16
	WT-3	28.41	14.86		WT-6	20.26	16.23
	WT-3	28.73	14.6		WT-6		16.17
	A1-1	29.95	15.44		A1-4	18.46	15.96
	A1-1	29.59	15.42		A1-4	18.38	15.88
	A1-1	28.85	15.15		A1-4	18.26	15.86
	A1-2	28.7	15.28		A1-5	19.09	15.44
	A1-2	29.53	15.19		A1-5	18.82	15.55
	A1-2		15.18		A1-5	18.98	15.42
	A1-3	27.72	14.62		A1-6	17.67	14.63
	A1-3	27.72	14.71		A1-6	17.56	14.24
	A1-3	28.43	14.69		A1-6	17.57	14.13
	A2-1	28.65	15.06		A2-4	16.99	15.28
	A2-1	27.99	14.85		A2-4	17.15	14.72
	A2-1	28.66	14.32		A2-4	16.91	14.87
	A2-2	28.07	14.08		A2-5	16.01	13.89
	A2-2	28.05	14.05		A2-5	15.89	14.03
	A2-2	27.63	14.07		A2-5	16.3	13.98
	A2-3	28.17	14.31		A2-6	17.15	15.43
	A2-3	27.47	14.5		A2-6	17.34	14.84
	A2-3	27.52	14.31		A2-6	17.64	14.49
