# Supplementary material for: Up-regulated IL-17 and Tnf signaling in bone marrow cells of young male osteogenesis imperfecta mice
Source: PeerJ. 2022 Aug 23;10:e13963. doi: 10.7717/peerj.13963 (PMC9415356; doi:10.7717/peerj.13963)
Supplement: Supplemental Information 2 [file peerj-10-13963-s002.xlsx]

## Sheet: Ifit1
		Ifit1	Gapdh
	WT-1	30.18	25.44
	WT-1	31.12	25.26
	WT-1		25.29
	WT-2	28.91	24.98
	WT-2	29.69	25
	WT-2		25.06
	WT-3	30.29	25.87
	WT-3	30.03	25.84
	WT-3	29.61	25.93
	A1-1	31.09	25.73
	A1-1	30.7	25.7
	A1-1
	A1-2	31.25	26.35
	A1-2	32.04	26.81
	A1-2
	A1-3	30.05	25.04
	A1-3	30.86	25.01
	A1-3	30.05
	A2-1	31.7	26.74
	A2-1	31.29	26.79
	A2-1	31.88	26.16
	A2-2	30.34	26.51
	A2-2	30.79	26.51
	A2-2	31.01	26.47
	A2-3	30.59	26.72
	A2-3	31.22	26.23
	A2-3		26.36

## Sheet: Irf7
	Irf7	Gapdh
WT-1	32.16	26.53
WT-1	31.81	25.79
WT-1	31.64	26.23
WT-2	31.22	25.44
WT-2	30.66	25.26
WT-2	31.04	25.29
WT-3	30.51	24.66
WT-3	30.59	24.85
WT-3	30.54	24.98
A1-1	31.01	25.73
A1-1	31.25	25.7
A1-1
A1-2	30.32	26.35
A1-2	31.07	26.81
A1-2
A1-3	32.11	26.32
A1-3	31.48	26.32
A1-3	31.49	25.78
A2-1	30.44	27.27
A2-1	30.35	26.67
A2-1
A2-2	31.08	26.74
A2-2	30.81	26.79
A2-2		26.16
A2-3	30.06	26.51
A2-3	30.46	26.51
A2-3		26.47

## Sheet: Ccl2
	Ccl2	Gapdh
WT-1	27.29	25.44
WT-1	27.04	25.26
WT-1	27.46	25.29
WT-2	27.01	24.66
WT-2	26.02	24.85
WT-2	26.15	24.98
WT-3	27.14	24.98
WT-3	27.07	25
WT-3	27.06	25.06
A1-1	26	25.73
A1-1	25.18	25.7
A1-1
A1-2	26.7	26.35
A1-2	27.08	26.81
A1-2	27.03
A1-3	27.15	26.32
A1-3	26.77	26.32
A1-3		25.78
A2-1	26.8	26.74
A2-1	26.6	26.79
A2-1	26.75	26.16
A2-2	26.82	26.51
A2-2	26.88	26.51
A2-2	25.59	26.47
A2-3	26.83	26.72
A2-3	26.78	26.23
A2-3		26.36

## Sheet: Jun
	Jun	Gapdh
WT-1	29.51	25.44
WT-1	29.31	25.26
WT-1	29.55	25.29
WT-2	28.84	24.98
WT-2	29.93	25
WT-2	28.85	25.06
WT-3	30.08	25.87
WT-3	29.81	25.84
WT-3		25.93
A1-1	28.07	26.35
A1-1	27.68	26.81
A1-1
A1-2	29.79	25.04
A1-2	29.07	25.01
A1-2
A1-3	29.27	26.63
A1-3	28.91	26.62
A1-3
A2-1	30	26.74
A2-1	29.79	26.79
A2-1	29.28	26.16
A2-2	28.47	26.51
A2-2	27.74	26.51
A2-2		26.47
A2-3	28.76	26.72
A2-3	29.2	26.23
A2-3		26.36

## Sheet: Cxcl10
	Cxcl10	Gapdh
WT-1	32.9	26.53
WT-1	32.19	25.79
WT-1		26.23
WT-2	31	24.66
WT-2	31.04	24.85
WT-2	31.54	24.98
WT-3	33.91	26.93
WT-3	34.06	27.29
WT-3
A1-1	31.49	25.65
A1-1	31.47	25.73
A1-1
A1-2	33.39	26.35
A1-2	32.97	26.81
A1-2
A1-3	32.08	24.2
A1-3	33.35	23.11
A1-3
A2-1	33.7	28.35
A2-1	32.58	27.98
A2-1
A2-2	33.07	26.56
A2-2	33.96	25.81
A2-2		26.58
A2-3	33.16	26.72
A2-3	33.39	26.23
A2-3		26.36

## Sheet: Lif
	Lif	Gapdh
WT-1	33.19	26.53
WT-1	32.44	25.79
WT-1		26.23
WT-2	32.88	25.44
WT-2	33.19	25.26
WT-2		25.29
WT-3	33.26	24.98
WT-3	32.68	25
WT-3	31.94	25.06
A1-1	31.57	25.73
A1-1	31.76	25.7
A1-1
A1-2	31.7	26.35
A1-2	32.34	26.81
A1-2	32.7
A1-3	32.95	26.63
A1-3	32.18	26.62
A1-3	31.48
A2-1	32.28	27.27
A2-1	31.96	26.67
A2-1	31.5
A2-2	31.6	26.74
A2-2	31.51	26.79
A2-2	31.72	26.16
A2-3	31.87	26.51
A2-3	32	26.51
A2-3	32.42	26.47

## Sheet: Ifng
	Ifng	Gapdh
WT-1	32.13	24.64
WT-1	32.74	25.63
WT-1		25.7
WT-2	31.83	25.48
WT-2	31.52	25.43
WT-2
WT-3	33.7	25.08
WT-3	34.15	24.21
WT-3		25.16
A1-1	28.8	25.65
A1-1	29.63	25.73
A1-1
A1-2	29.9	25.19
A1-2	30.3	24.64
A1-2	30.59
A1-3	27.7	25.89
A1-3	28.32	26.51
A1-3
A2-1	32.12	28.35
A2-1	32.09	27.98
A2-1
A2-2	28.3	25.81
A2-2	28.76	25.66
A2-2		26.72
A2-3	29.52	26.84
A2-3	29.66	26.79
A2-3

## Sheet: Stat1
	Stat1	Gapdh
WT-1	28.2	24.64
WT-1	27.05	25.63
WT-1		25.7
WT-2	30.99	24.47
WT-2	29.91	24.85
WT-2
WT-3	31.23	27.44
WT-3	31.58	26.89
WT-3
A1-1	29.6	25.65
A1-1	29.31	25.73
A1-1	29.29
A1-2	26.52	25.19
A1-2	27.56	24.64
A1-2
A1-3	30.29	25.89
A1-3	30.75	26.51
A1-3	31.25
A2-1	31.06	28.35
A2-1	31.54	27.98
A2-1
A2-2	31.26	26.92
A2-2	31.77	26.98
A2-2
A2-3	31.61	26.91
A2-3	31.06	26.83
A2-3	30.86	26.34

## Sheet: Tnfα
	Tnfα	Gapdh
WT-1	26.64	24.58
WT-1	27.14	24.45
WT-1	26.92	24.9
WT-2	26.71	25.08
WT-2	25.68	24.21
WT-2		25.16
WT-3	26.76	24.47
WT-3	26.66	24.85
WT-3	26.25
A1-1	24.81	25.19
A1-1	23.65	24.64
A1-1	23.91
A1-2	23.98	24.2
A1-2	23.2	23.11
A1-2
A1-3	24.44	25.89
A1-3	24.87	26.51
A1-3	24.98
A2-1	26.47	26.92
A2-1	26.33	26.98
A2-1
A2-2	26.45	26.91
A2-2	25.55	26.83
A2-2		26.34
A2-3	26.86	26.84
A2-3	26.25	26.79
A2-3
